# Supplementary material for: PCA3 and PCA3-Based Nomograms Improve Diagnostic Accuracy in Patients Undergoing First Prostate Biopsy
Source: MDPI journal article supplement (doi:10.3390/ijms140917767), 2013-08-29
Supplement: s1 [file s1]

## Supplementary Information

**Figure S1.** Risk of positive initial biopsies depending on urinary PCA3 score ( $n = 594$  patients) Numbers of patients are indicated below the histograms for each category of PCA3 score. PCA3 = prostate cancer gene 3; PCa = prostate cancer.

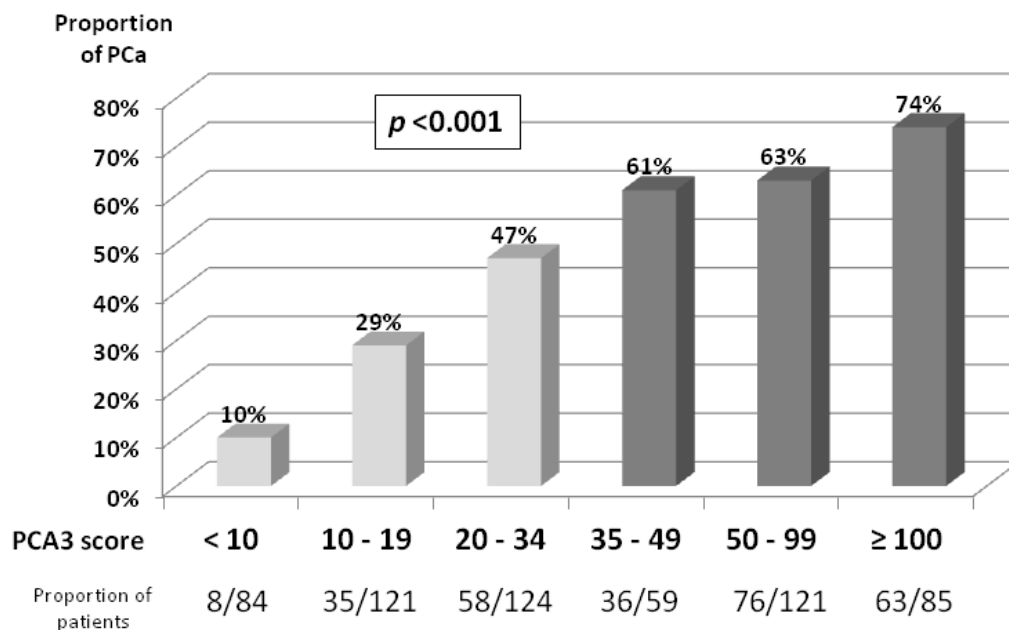

**Figure S2.** Diagnostic performances of serum PSA and urinary PCA3 score in predicting initial biopsy outcome ( $n = 594$  patients). PSA = prostate-specific antigen; PCA3 = prostate cancer gene 3.

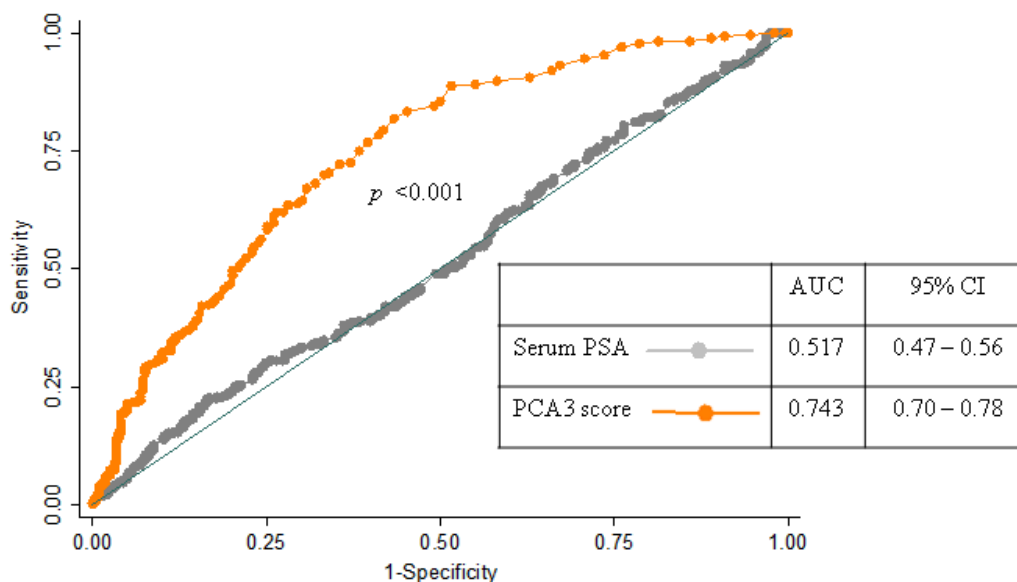

**Figure S3.** Decision curve analysis of predicting prostate cancer on initial prostate biopsy using regression models ( $n = 594$  patients). Base model included age, DRE findings (suspicious vs. non-suspicious), prostate volume and serum total PSA. Urinary PCA3 score was added to the base model as either a continuous or a binary variable (around a cutoff 35) variable.

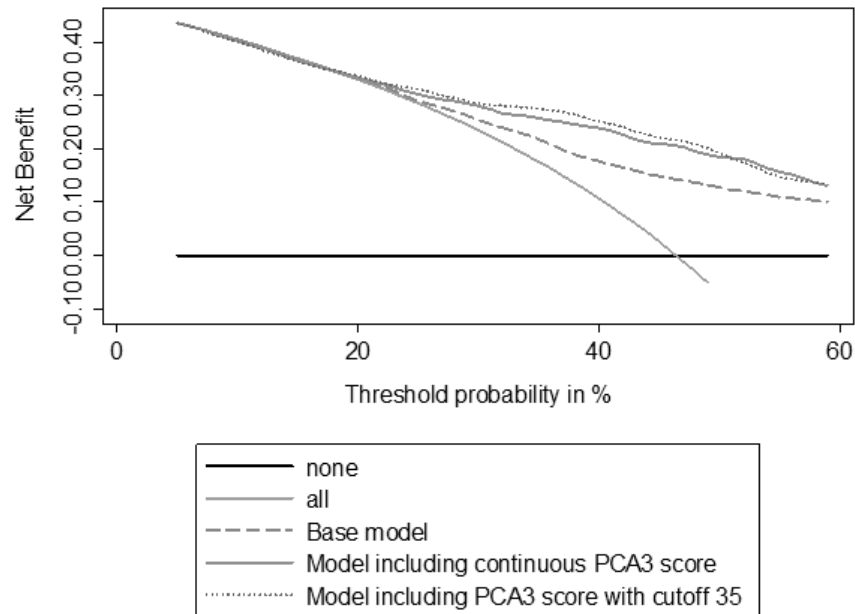

**Figure S4.** Comparison between the risk of prostate cancer as predicted by the Hansen’s nomogram and the actual proportion of positive initial biopsies in the entire population ( $n = 594$  patients). PCa = prostate cancer.

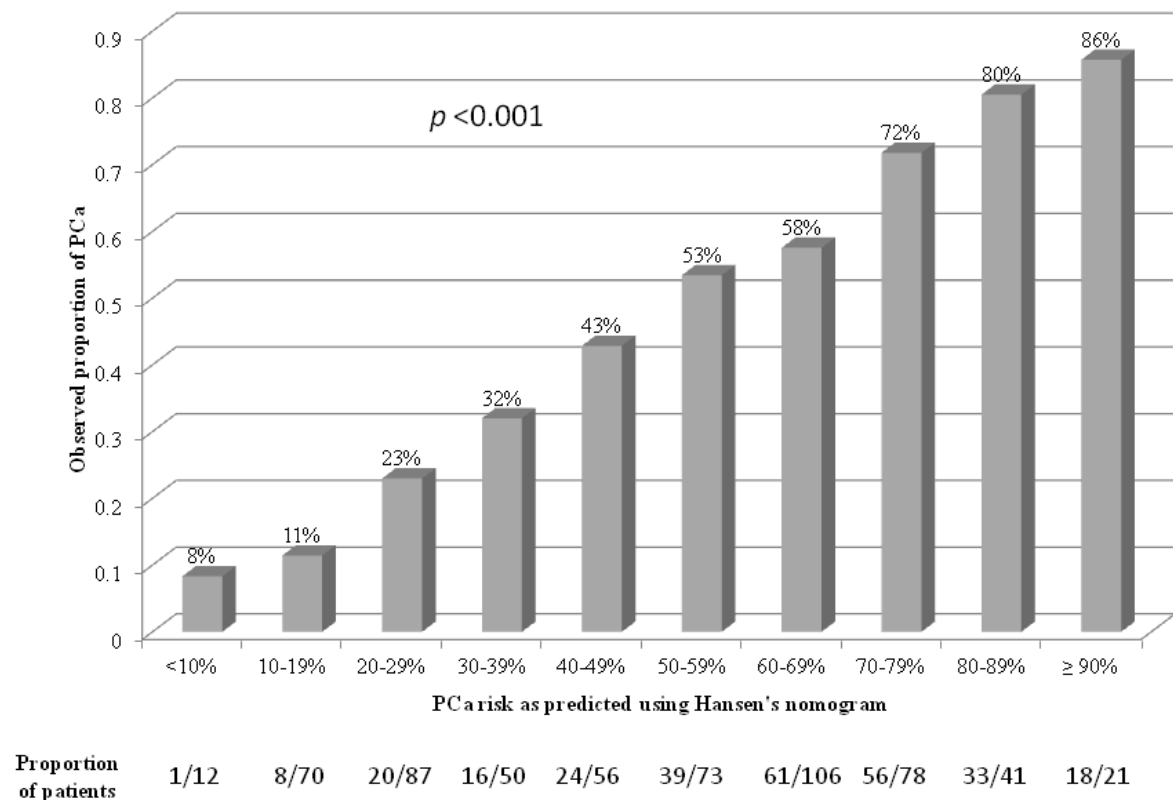

**Figure S5.** Comparison of performances of the three published urinary PCA3-incorporating nomograms in predicting results of initial prostate biopsies ( $n = 536$  patients) AUC = area under the curve; CI = confidence interval; PCPT = PCA3-incorporating prostate cancer prevention trial risk calculator. \* Proportion of well-classified patients according to the best automatically calculated cutoff.

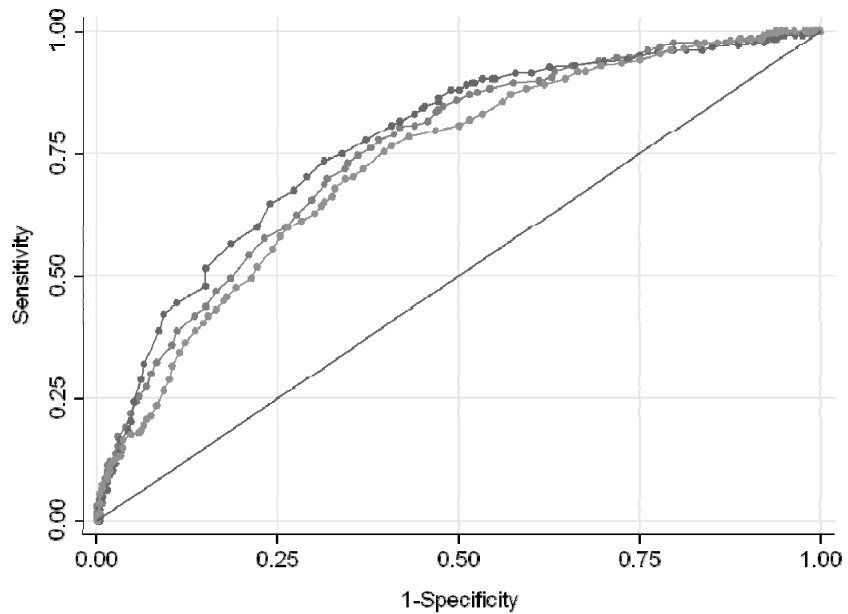

|                                           |                                                      | AUC (95% CI)          | Predictive accuracy* (95% CI) |
|-------------------------------------------|------------------------------------------------------|-----------------------|-------------------------------|
| $p = 0.053$<br>$p = 0.201$<br>$p = 0.115$ | Updated PCA3-incorporating PCPT Risk calculator [20] | 0.730 (0.688 – 0.772) | 66.6% (62.6 – 70.6)           |
|                                           | Hansen's nomogram [14]                               | 0.753 (0.713 – 0.794) | 69.0% (65.1 – 73.0)           |
|                                           | Chun's nomogram [21]                                 | 0.773 (0.733 – 0.812) | 70.3% (66.4 – 74.2)           |

**Table S1.** Pathological findings.

| <b>Pathological findings</b>                |                |  |          |
|---------------------------------------------|----------------|--|----------|
| Number of sampled cores <sup>a</sup>        |                |  |          |
| 12 cores                                    | <i>n</i> = 520 |  | 88%      |
| 13–14 cores                                 | <i>n</i> = 64  |  | 11%      |
| 15–18 cores                                 | <i>n</i> = 10  |  | 2%       |
| Gleason score <sup>b</sup>                  |                |  |          |
| 3 + 3 = 6                                   | <i>n</i> = 148 |  | 54%      |
| 3 + 4 = 7                                   | <i>n</i> = 81  |  | 29%      |
| 4 + 3 = 7                                   | <i>n</i> = 30  |  | 11%      |
| 4 + 4 = 8                                   | <i>n</i> = 15  |  | 5%       |
| 4 + 5 = 9                                   | <i>n</i> = 1   |  | 0.5%     |
| 5 + 4 = 9                                   | <i>n</i> = 1   |  | 0.5%     |
| Proportion of invaded cores <sup>b</sup>    |                |  |          |
| ≤33%                                        | <i>n</i> = 191 |  | 69%      |
| >33%                                        | <i>n</i> = 85  |  | 31%      |
| Proportion of invaded tissue <sup>b,c</sup> |                |  |          |
| Median (IQR)                                | 5%             |  | (2%–12%) |

<sup>a</sup> Assessed in the 594 patients; <sup>b</sup> Assessed in the 276 patients with positive biopsies; <sup>c</sup> Ratio length of invaded prostatic tissue/total length of biopsied prostatic tissue; IQR: interquartile range.

**Table S2.** Variation of diagnostic performances of urinary PCA3 test depending on various cutoffs.

| <b>Cutoff</b> | <b>Sensitivity</b> | <b>Specificity</b> | <b>Positive predictive value</b> | <b>Negative predictive value</b> | <b>Accuracy</b> |
|---------------|--------------------|--------------------|----------------------------------|----------------------------------|-----------------|
| 17            | 89%                | 45%                | 58%                              | 83%                              | 65%             |
| 21            | 82%                | 57%                | 62%                              | 78%                              | 68%             |
| 24            | 78%                | 59%                | 62%                              | 76%                              | 68%             |
| 30            | 70%                | 67%                | 65%                              | 72%                              | 68%             |
| 35            | 63%                | 72%                | 66%                              | 69%                              | 68%             |
| 40            | 60%                | 74%                | 67%                              | 68%                              | 67%             |
| 45            | 55%                | 77%                | 67%                              | 66%                              | 67%             |
| 50            | 50%                | 79%                | 67%                              | 65%                              | 66%             |

PCA3 = prostate cancer gene 3; accuracy = proportion of correctly classified patients.

**Table S3.** Univariable logistic regression models predicting any prostate cancer and high-grade prostate cancer at initial biopsy.

|                                   | Any PCa          |         |                     |       | HGPCa*           |         |                     |       |
|-----------------------------------|------------------|---------|---------------------|-------|------------------|---------|---------------------|-------|
|                                   | OR (95% CI)      | p-Value | AUC (95% CI)        | PA    | OR (95% CI)      | p-Value | AUC (95% CI)        | PA    |
| Age, year                         | 1.05 (1.03–1.08) | <0.001  | 0.602 (0.556–0.647) | 58.1% | 1.07 (1.04–1.11) | <0.001  | 0.624 (0.570–0.679) | 78.5% |
| DRE (suspicious vs. unsuspecting) | 1.10 (1.05–1.16) | <0.001  | 0.690 (0.649–0.705) | 57.7% | 1.18 (1.12–1.24) | <0.001  | 0.742 (0.736–0.748) | 78.6% |
| Prostate volume, cm <sup>3</sup>  | 0.97 (0.96–0.98) | <0.001  | 0.641 (0.597–0.685) | 60.8% | 0.97 (0.96–0.98) | <0.001  | 0.651 (0.595–0.708) | 78.5% |
| Serum PSA, ng/mL                  | 1.03 (0.98–1.09) | 0.257   | 0.517 (0.470–0.563) | 54.0% | 1.09 (1.03–1.16) | 0.004   | 0.562 (0.504–0.620) | 78.5% |
| PCA3 score, continuously coded    | 1.01 (1.01–1.02) | <0.001  | 0.743 (0.704–0.782) | 63.6% | 1.01 (1.00–1.01) | <0.001  | 0.689 (0.641–0.736) | 77.4% |
| PCA3 score >21 vs. ≤21            | 5.90 (4.04–8.61) | <0.001  | 0.794 (0.793–0.795) | 68.4% | 4.75 (2.82–7.99) | <0.001  | 0.785 (0.781–0.788) | 78.5% |
| PCA3 score ≥35 vs. <35            | 4.39 (3.11–6.20) | <0.001  | 0.743 (0.741–0.745) | 67.9% | 2.76 (1.84–4.14) | <0.001  | 0.661 (0.613–0.701) | 78.5% |

Analyses were performed in the 594 patients. PCa = prostate cancer; HGPCa = high-grade prostate cancer (Gleason score  $\geq 7$ ); OR = odds ratio; CI = confidence interval; AUC = area under the curve; PA = predictive accuracy using the best calculated cutoff; PSA = prostate-specific antigen; DRE = digital rectal examination; PCA3 = prostate cancer gene 3; \* For this analysis, men with low-grade prostate cancer (Gleason score <7) were classified the same as men with negative biopsies.

**Table S4.** Multivariate analysis evaluating performances of logistic regression models to predict high-grade prostate cancer.

|                                  | Multivariate analysis |                 |                                      |                 |                               |                 |                               |                 |
|----------------------------------|-----------------------|-----------------|--------------------------------------|-----------------|-------------------------------|-----------------|-------------------------------|-----------------|
|                                  | Base model            |                 | Base model+<br>continuous PCA3 score |                 | Base model+<br>PCA3 cutoff 21 |                 | Base model+<br>PCA3 cutoff 35 |                 |
|                                  | OR (95% CI)           | <i>p</i> -Value | OR (95% CI)                          | <i>p</i> -Value | OR (95% CI)                   | <i>p</i> -Value | OR (95% CI)                   | <i>p</i> -Value |
| Age, year                        | 1.09 (1.05–1.12)      | <0.001          | 1.08 (1.04–1.11)                     | <0.001          | 1.07 (1.03–1.11)              | <0.001          | 1.07 (1.03–1.11)              | <0.001          |
| DRE                              | 1.17 (1.10–1.24)      | <0.001          | 1.17 (1.10–1.24)                     | <0.001          | 1.17 (1.10–1.24)              | <0.001          | 1.17 (1.11–1.24)              | <0.001          |
| Prostate volume, cm <sup>3</sup> | 0.95 (0.94–0.97)      | <0.001          | 0.96 (0.94–0.97)                     | <0.001          | 0.96 (0.94–0.97)              | <0.001          | 0.96 (0.94–0.97)              | <0.001          |
| Serum PSA, ng/mL                 | 1.16 (1.08–1.25)      | <0.001          | 1.16 (1.07–1.25)                     | <0.001          | 1.15 (1.06–1.24)              | <0.001          | 1.15 (1.07–1.24)              | <0.001          |
| Urinary PCA3 score               | -                     | -               | 1.00 (1.00–1.01)                     | 0.003           | 3.62 (2.07–6.36)              | <0.001          | 2.3 (1.46–3.64)               | <0.001          |
| AUC                              | 0.770                 |                 | 0.788                                |                 | 0.797                         |                 | 0.791                         |                 |
| IC95%                            | (0.723–0.817)         |                 | (0.744–0.833)                        |                 | (0.754–0.839)                 |                 | (0.747–0.834)                 |                 |
| <i>p</i> -Value*                 | -                     |                 | <i>p</i> = 0.036                     |                 | <i>p</i> = 0.037              |                 | <i>p</i> = 0.049              |                 |
| PA                               | 81.3%                 |                 | 81.1%                                |                 | 81.5%                         |                 | 81.8%                         |                 |
| IC 95%                           | (78.2%–84.4%)         |                 | (78.0%–84.3%)                        |                 | (78.3%–84.6%)                 |                 | (78.7%–84.9%)                 |                 |
| Increment in PA*                 | -                     |                 | -0.2%                                |                 | +0.2%                         |                 | +0.5%                         |                 |
| <i>p</i> -Value *                | -                     |                 | <i>p</i> = 0.941                     |                 | <i>p</i> = 0.941              |                 | <i>p</i> = 0.822              |                 |

Analyses were performed in the 594 patients. AUC = area under the receiver operating curve; CI = confidence interval; DRE = digital rectal examination (suspicious vs. unsuspecting); OR = odds ratio; PA = predictive accuracy (proportion of well-classified patients according to the best automatically calculated cutoff); PSA = prostate-specific antigen; PCA3 = prostate cancer gene 3. \* when comparing to the base model.
